1 **Maternal microbiota *Bifidobacterium* promotes placental vascularization,**  
2 **nutrient transport and fetal growth in mice**

3  
4 **Authors:** Jorge Lopez-Tello<sup>1\*</sup>, Zoe Schofield<sup>2\*</sup>, Raymond Kiu<sup>2</sup>, Matthew J. Dalby<sup>2</sup>, Douwe van  
5 Sinderen<sup>3</sup>, Gwénaëlle Le Gall<sup>4</sup>, Amanda N Sferruzzi-Perri<sup>1†</sup>, Lindsay J Hall<sup>2,5†</sup>

6  
7 **Affiliations:**

8 <sup>1</sup>Department of Physiology, Development, and Neuroscience, Centre for Trophoblast  
9 Research, University of Cambridge, Cambridge, UK

10 <sup>2</sup>Gut Microbes & Health, Quadram Institute Bioscience, Norwich Research Park, Norwich, UK

11 <sup>3</sup>APC Microbiome Institute, University College Cork, Cork, Ireland

12 <sup>4</sup>Norwich Medical School, University of East Anglia, Bob Champion Research and Education  
13 Building, James Watson Road, Norwich Research Park, Norwich NR4 7UQ, UK

14 <sup>5</sup>Chair of Intestinal Microbiome, School of Life Sciences, ZIEL – Institute for Food & Health,  
15 Technical University of Munich, Freising, Germany

16  
17 <sup>\*†</sup>Contributed equally

18  
19 **Corresponding author names:** Jorge Lopez-Tello (jl898@cam.ac.uk), Amanda N. Sferruzzi-  
20 Perrri (ans48@cam.ac.uk) & Lindsay Hall (lindsay.hall@tum.de | Lindsay.Hall@quadram.ac.uk)

21  
22 **Author Contributions:** JL-T, ZS, ANS-P, LJH designed research; JL-T, ZS, RK, GLG  
23 conducted research, JL-T, ZS, RK, MJD contributed analytic tools and performed analysis;  
24 DvS contributed reagents; JL-T, ZS, ANS-P, LJH wrote the paper with feedback from all the  
25 authors.

26  
27 **Competing Interest Statement:** The authors declare that they have no competing interests.

28  
29 **Classification:** Biological Sciences – Physiology

30

31 **Keywords:** Pregnancy, Placenta, Microbiota, Fetus, *Bifidobacterium*

32

33 **This file includes:**

34 Main Text: 5,638

35 Main Figures: 3

36 Tables: 1

37 Supplementary Figures: 3

38 Supplementary Tables: 3

39 References: 46

40

41 **Significance:** Metabolism is highly influenced by the gut microbiota, which is particularly  
42 important during gestation, when key metabolites are used for fetoplacental growth. However,  
43 the contribution of the maternal gut microbiota (and its microbiota-generated metabolites) in  
44 determining fetal outcomes is largely unexplored. Here, we show that maternal gut  
45 communities and specific microbiota members are key modulators of placental phenotype with  
46 important consequences for fetal development. We have revealed novel roles for a maternal  
47 *Bifidobacterium* species, that include the control of placental capillary morphogenesis and  
48 nutrient transporters (glucose and lipids), which affect fetal metabolism and growth. Our work  
49 has important implications for the establishment of novel therapeutic strategies to treat  
50 pregnancy complications.

51

52 **Abstract**

53 The gut microbiota plays a central role in regulating host metabolism. However, while  
54 substantial progress has been made in discerning how the microbiota influences host functions  
55 post birth and beyond, little has been carried out into understanding how key members of the  
56 maternal gut microbiota can influence fetoplacental growth. Here, using germ-free and  
57 specific-pathogen-free mice, we demonstrate that the bacterium *Bifidobacterium breve*  
58 UCC2003 modulates maternal body adaptations, placental vasculature growth and nutrient  
59 transporter capacity, with implications for fetal metabolism and growth. The effects of *B. breve*  
60 UCC2003 on fetoplacental growth are mediated, in part, by changes in the maternal and

61 placental metabolome (*i.e.* acetate and carnitine). Analysis of placental vascular bed confirmed  
62 that *Bifidobacterium* improves fetal capillary elongation via changes in *Igf2P0*, *Dlk1* and  
63 *Mapk14* expression. Additionally, *B. breve* UCC2003, acting through *Slc2a1* and *Fatp3-4*  
64 transporters, was shown to restore fetal glycaemia and improve fetal growth in association with  
65 changes in the fetal hepatic transcriptome. This study provides knowledge towards a novel and  
66 safe therapeutic strategy for treating pregnancy disorders via modulation of the maternal gut  
67 microbiota.

68

## 69 **Main Text**

70

## 71 **Introduction**

72 All nutrients and metabolites required for feto-placental growth are provided by the mother,  
73 which in turn is thought to be influenced by the maternal gut microbiota through breakdown of  
74 complex dietary components (1). During gestation, liberated metabolites may be used by the  
75 placenta for morphogenesis, and transported across the placenta for use by the fetus for  
76 growth and development (2, 3). This is highly important in late gestation, when fetal growth is  
77 maximal, and aligns with alterations in the maternal microbiota, including increasingly higher  
78 levels of the beneficial bacterial genus *Bifidobacterium* (4–6). Failure of the mother to provide  
79 nutrients and metabolites to the fetus can result in pregnancy complications including small for  
80 gestational age (SGA), fetal loss and stillbirth. However, the contribution of the maternal  
81 microbiota in determining fetal outcomes is largely unexplored, although knowledge in this  
82 area would be highly valuable for developing treatments to improve fetal growth, with benefits  
83 for population health.

84

85 Here, we hypothesized that the maternal gut microbiota, and specific microbiota members,  
86 regulate fetal growth by modulating placental development and nutrient supply. We tested this  
87 hypothesis by comparing conceptus growth in three different maternal gut microbiota  
88 conditions by using germ-free (GF) mice, conventional specific-pathogen-free (SPF) mice and  
89 maternal GF mice colonized with *Bifidobacterium breve* UCC2003 (7). As a keystone  
90 microbiota member and ‘probiotic’ species, *B. breve* may represent a suitable option for

91 treating pregnancy complications by exerting beneficial metabolic effects on maternal  
92 physiology and associated fetoplacental growth. Indeed, *B. breve* induced changes in  
93 maternal physiology, placental morphogenesis and the abundance of placental glucose and  
94 lipid transporters, which were associated with improvements in growth and metabolism of the  
95 fetus.

96

## 97 **Results**

98

### 99 ***Germ-free mice treated with B. breve have altered body composition and caecum*** 100 ***metabolic profile***

101 To assess whether maternal microbiota is able to influence fetoplacental growth, GF mice  
102 were treated orally with *B. breve* UCC2003 from day 10 of gestation (treatment on days 10, 12  
103 and 14; i.e. BIF group), and compared to GF and SPF dams (for experimental overview see  
104 Figure S1, and *B. breve* colonization levels Figure S2).

105

106 Maternal body composition differed between groups with GF and BIF mice showing increased  
107 digestive tract weight and lower pancreas mass compared to SPF mice. GF and BIF mice had  
108 similar circulating concentrations of glucose and insulin to SPF mice (assessed in fed  
109 conditions; Table 1). Compared to SPF mice, treatment with *B. breve* reduced maternal  
110 gonadal fat depot, liver, and spleen weights in BIF mice. No differences were observed in the  
111 circulating concentrations of leptin, cholesterol, triglycerides, or free fatty acids in maternal  
112 serum (Table 1).

113

114 Metabolomics analysis in maternal caecum samples indicated that the concentration of 13 out  
115 of 115 metabolites were significantly altered (Table 1 and Table S1). Acetate was significantly  
116 influenced by *B. breve* (Table 1), with BIF dams having intermediate concentrations compared  
117 to SPF and GF mice (the low levels of acetate detectable in GF mice, most likely originated  
118 from the diet and/or are host-derived). These findings suggest that acetate producing *B. breve*  
119 and the wider gut microbiota may exert selective effects on maternal metabolic and immune  
120 organs.

121

122 **Maternal gut microbiota and *B. breve* regulate fetal growth by controlling fetal**  
123 **glycaemia**

124 Although the three experimental groups had similar numbers of viable fetuses per litter, the GF  
125 group had higher rates of resorptions (fetal losses) compared to SPF and BIF mice (Figure 1A-  
126 B). In fact, all GF dams had at least one resorption, whilst BIF reduced the appearance of  
127 resorptions by 50%. Conceptus mass (defined as the sum of fetal weight and its placenta) and  
128 fetal growth were significantly impaired in GF mice by the lack of the maternal microbiota,  
129 whilst these two parameters were improved with the administration of *B. breve* (Figure 1C-D).  
130 Compared to SPF and BIF mice, GF fetuses were smaller, with reduced liver weight, but  
131 preserved brain size. Fetuses from GF mice also displayed hypoglycaemia compared to SPF  
132 and BIF groups (Figure 1D-G). *B. breve* improved fetal weight and restored fetal glycaemia  
133 and liver growth. The rate of SGA, defined as fetuses below the 10<sup>th</sup> percentile ( $\leq 495\text{mg}$ ; SPF  
134 control population), was reduced in BIF compared to GF mice (Figure 1E). These findings  
135 highlight that the maternal microbiota, and *B. breve*, positively modulate fetal growth and  
136 metabolism.

137

138 **Maternal *B. breve* modulates fetal hepatic transcriptome**

139 The liver is a key organ for glucose storage and production. As fetuses from BIF mice had  
140 enlarged livers and improved glycaemia, we next determined if there were changes in the fetal  
141 hepatic transcriptome (data obtained on GD18.5, when fetal liver function is particularly active  
142 prior to term; Figure 1H). A total of 602 genes were differentially expressed, with 94  
143 significantly up-regulated and 508 down-regulated genes in BIF group, when compared to GF  
144 group (Figure 1I-J). Functional enrichment analysis indicated many metabolic pathways were  
145 regulated in the fetal livers of BIF mice including carboxylic acid and lipid metabolic processes,  
146 steroid hydroxylase activity, fatty acid metabolism and response to glucocorticoid (Figure 1K;  
147 Supplementary Table 1). Therefore, maternal *B. breve* appear to exert beneficial alterations in  
148 fetal hepatic function to support fetal growth.

149

150

151 ***Maternal gut microbiota and B. breve control placental morphogenesis***

152 To further understand the links between the maternal microbiota and the regulation of fetal  
153 growth, we assessed placental structure. When compared to SPF mice, placentas were lighter  
154 in GF and BIF mice without changes in placental efficiency (Figure 2A-B). Analysis of placental  
155 compartments showed that lack of maternal gut microbiota significantly hampered growth of  
156 the placental labyrinth transport zone (Lz), without compromising the endocrine junctional zone  
157 or decidua volumes (Figure 2C). It also did not affect placental glycogen storage (Figure 2D).  
158 Structural analysis of the Lz showed that although the volume of the trophoblast was  
159 unaffected, maternal blood spaces were reduced in both GF and BIF mice compared to SPF  
160 (Figure 2E-F). Moreover, in the GF group, the volume of fetal capillaries and surface area for  
161 exchange of the Lz were shown to be reduced; effects that were partially ameliorated in BIF  
162 mice (Figure 2G-H). The barrier between maternal and fetal blood was also determined to be  
163 thinner in BIF *versus* GF mice (Figure 2F-I). Lz apoptosis levels were similar between groups  
164 (Figure 2J).

165  
166 To define the molecular mechanisms behind the expansion of the Lz, and increased fetal  
167 capillary volume in the BIF mice, we quantified the expression of select genes in micro-  
168 dissected Lz. Common angiogenic factors *Vegf*, *Ang1*, *Ang2* were similarly expressed between  
169 groups (Figure 2K). However, the expression of signaling pathways involved in cell  
170 proliferation and growth, namely the MAPK pathway, was significantly altered by changes in  
171 maternal gut microbiota; *Mapk1* was shown to be increased in both GF and BIF, while *Mapk14*  
172 (also known as *p38Mapk*) was revealed to be specifically up-regulated in the Lz of BIF mice. In  
173 addition, *Dlk1* and *Igf2P0*, which are key genes implicated in metabolism and Lz formation,  
174 were significantly up-regulated in the BIF group (Figure 2K). The expression of *Akt* did not vary  
175 with group. Overall, these findings suggest that the maternal gut microbiota, and *B. breve*,  
176 regulate the development of the mouse placental Lz via modulation of specific cell growth and  
177 metabolic genes.

178

179

180 **Maternal gut microbiota and *B. breve* do not affect placental glucocorticoid handling,**  
181 **but controls key placental nutrient transporters**

182 Glucocorticoids are a class of steroid hormones that can affect both fetal and placental  
183 formation. To control glucocorticoid actions on the conceptus, the placenta expresses 11 $\beta$ -  
184 hydroxysteroid dehydrogenase type 1 and 2 (*11Hsd1* and *11Hsd2*). We found that the  
185 expression of these genes was unaltered in the Lz by changes in the maternal gut microbiota  
186 (no changes between SPF, GF or BIF; Figure 2L). To better understand the changes in fetal  
187 growth and glycemia between groups, we quantified the expression of selected amino acid,  
188 glucose and lipid transporters in the Lz. We found no difference in the expression of system A  
189 amino acid transporters (*Slc38a1*, *Slc38a2*, *Slc38a4*) between groups (Figure 2M). However,  
190 the key glucose transporter *Slc2a1* was up-regulated in the Lz of BIF mice compared to GF  
191 mice, with intermediate values for SPF (*Slc2a3* mRNA levels were similar between groups;  
192 Figure 2N). Expression of specific fatty acid transporters (*Fatp3* and *Fatp4*) was also increased  
193 in BIF compared to GF mice (with intermediate values for SPF and no change in *Cd36*, *Fatp1*  
194 or *Fatp6* between groups; Figure 2N). Collectively, these data suggest that maternal gut  
195 microbiota, and *B. breve*, regulate fetal growth by inducing changes in the expression of key  
196 nutrient transporters within the placenta.

197  
198 **Differences in placental labyrinth growth are linked to an altered placental metabolome**

199 To gain further mechanistic understanding of the changes observed in the placental Lz and  
200 fetal liver, we analysed >80 metabolites at GD16.5 (Figure 3 and Table S1). We found 5  
201 metabolites significantly altered in the placental Lz (Figure 3). Amino adipic acid in the Lz was  
202 very low in GF/BIF groups as well as in fetal livers (Figure 3A). Treatment with *B. breve*  
203 significantly reduced the concentrations of acetylcarnitine and carnitine in Lz tissue compared  
204 to SPF placentas, but not in fetal livers (Figure 3B-C). Levels of formate in placental Lz were  
205 significantly elevated in both GF and BIF compared to SPF mice (Figure 3D), with a similar  
206 trend (although not significant) in fetal liver samples. Acetate was also altered in the Lz (Figure  
207 3E), with concentrations significantly lower in the SPF compared to the GF group, whilst BIF  
208 samples showed intermediate levels (although these levels were much lower than observed in  
209 the maternal caecum). Similar to formate, concentrations of acetate in fetal liver followed

210 similar directions to the LZ, yet were not statistically different between groups. These data  
211 suggest that maternal gut microbiota, and *B. breve*, regulate the fetal and placental growth via  
212 modulation of the placental LZ metabolome.

213

## 214 **Discussion**

215 In this study, we provide evidence that the maternal microbiota and *B. breve* regulate maternal  
216 body composition during gestation and beneficially modulate fetoplacental growth. To the best  
217 of our knowledge, this is the first demonstration of a maternal gut bacterium remotely  
218 controlling placental vascular growth and nutrient transporters, with important implications for  
219 fetal glycaemia and fetal growth. We observed that the effects of *Bifidobacterium* are partially  
220 mediated by altered metabolites in maternal caecum and in placental LZ tissue, with alterations  
221 in the expression of key genes in the placental LZ and fetal liver.

222

223 *Bifidobacterium* is the dominant microbiota member in vaginally delivered, breast fed infants,  
224 with certain species and strains known to stimulate and aid the maturation of the immune  
225 system (8). *B. breve* UCC2003 also regulates responses at the gut barrier, inducing  
226 homeostatic epithelial cell programming, and protecting against inflammatory insults (9, 10).  
227 Importantly, pregnancy is accompanied by increasing *Bifidobacterium* abundance in the gut of  
228 women and mice (5), which is associated with changes in progesterone concentrations during  
229 pregnancy. Additionally, alterations in the abundance of *Bifidobacterium* are also linked to the  
230 development of serious pregnancy complications like preeclampsia (11). Our study shows that  
231 *B. breve* improves pregnancy outcomes in mice, as indicated by lower numbers of resorptions  
232 and an increased number of normally grown fetuses within the litter (5). *B. breve* UCC2003  
233 was also shown to induce changes in the metabolite milieu, including acetate, acetylcarnitine  
234 and carnitine in the mother and placenta, which were likely key for the beneficial effects on  
235 fetal growth. Acetate is a major bifidobacterial fermentation by-product, which directly mediates  
236 epithelial cell responses but also exerts systemic beneficial metabolic effects (12, 13). More  
237 generally, microbial-derived short-chain fatty acids (SCFAs) modulate multiple host  
238 physiological systems and during pregnancy are associated with maternal gestational weight,  
239 neonatal length and body weight, and protection against allergic airway disease in the



240 developing fetus (14, 15). Acetate crosses the placenta (15), so in our model, the elevated  
241 maternal *B. breve*-derived acetate may exert beneficial effects on fetoplacental growth via (i)  
242 maternal effects, through interactions within the maternal gut mucosa as evidenced by higher  
243 maternal caecum acetate concentrations in *B. breve* supplemented (and SPF) dams vs. GF  
244 and the subsequent impact on maternal organs (liver, adipose and spleen) and nutrient  
245 handling, (ii) effects on the placenta, through use of acetate for cellular metabolism, growth  
246 and function, and/or (iii) effects on the fetal metabolism following transport of acetate across  
247 the placenta to the fetus. Compared to the maternal caecum, levels of acetate were relatively  
248 low in the placental Lz and fetal liver (for all 3 groups). This suggests that *B. breve* (and SPF  
249 microbiota)-derived acetate may be used to support anabolic processes *in utero* (hence the  
250 very low levels detected), and together with changes in acetylcarnitine and carnitine, may be  
251 supported by our observations of elevated fatty acid transporter expression in the placenta and  
252 differentially regulated genes in the fetal liver. The observed modulation of immune-associated  
253 pathways in the fetal liver, including those associated with G protein-coupled receptor  
254 signalling (e.g. *Dusp9*), also indicates a role for direct acetate-associated responses (16).  
255 Moreover, previous work in adult mice suggests elevation of gut acetate levels due to  
256 *Bifidobacterium* treatment plays a key role in regulating glucose handling systemically, and  
257 reduces visceral fat accumulation (linking to our observation of reduced maternal gonadal fat  
258 deposition in *B. breve*-treated dams) (17). *B. breve* supplementation also restored fetal  
259 glycaemia in GF mice, achieving similar values to that seen for SPF fetuses. Previous *in vivo*  
260 studies indicate different strains of *Bifidobacterium* (including *B. breve*) modulate glucose  
261 handling (18), with this genus also consistently associated with potential protection against  
262 human metabolic disorders e.g. type 2 diabetes (19, 20).

263

264 *B. breve* was shown to significantly improve the placental vascular bed by modifying the  
265 elongation of their fetal capillary network, which is required for adequate fetal growth (21). The  
266 mechanisms governing this improvement could be partially mediated by changes in the  
267 expression of two imprinted genes (22), *Igf2* (namely the placenta-exclusive isoform, *Igf2P0*)  
268 and *Dlk1*, and via MAPK upregulation (specifically *Mapk14*). In this regard, deletion of *Igf2P0*  
269 results in fetoplacental growth restriction in association with reduced placental surface area

270 for exchange, fetal capillary volume and increased barrier thickness (reviewed by (23));  
271 parameters that were all improved by *B breve* UCC2003 in line with the *Igf2P0* mRNA  
272 upregulation). Interestingly, *Igf2P0* is important for the structural and transport adaptations  
273 occurring in the placenta in response to maternal nutritional restriction (24). *Dlk1*, a non-  
274 canonical ligand of the Notch signalling pathway localized to the endothelial cells of fetal  
275 capillaries in the placental Lz, also regulates placental vascularisation and branching  
276 morphogenesis (25). In addition, IGF2 and DLK1 can both mediate cellular actions via the  
277 MAPK pathway (26, 27). *Mapk14*, also known as p38MAPK, forms part of a signal transduction  
278 pathway that has been linked to environmental stresses and inflammatory cytokines (28).  
279 However, p38MAPK also regulates many normal cellular processes, including proliferation and  
280 cytoskeletal organisation. Furthermore, research in mice has demonstrated that *Mapk14* is  
281 essential for embryogenesis and placental Lz angiogenesis and vascular remodeling (29). In  
282 addition, placentas exposed to *B. breve* UCC2003, had lower concentrations of acetylcarnitine  
283 and carnitine compared to SPF, suggesting a greater reliance on these compounds for energy  
284 production, or enhanced transfer of these fatty acids to the fetus (30). Carnitine is well-known  
285 for mediating the transport of fatty acids into mitochondrial matrix for fatty acid  $\beta$ -oxidation.  
286 Carnitine can also promote p38MAPK signalling activation in cardiac tissue (31). Taken  
287 together, placental structural, transport and metabolic changes seen with *B. breve* UCC2003  
288 treatment may link to the altered metabolites/nutrient milieu in the mother and would have  
289 been beneficial in providing additional substrates for fetal growth and development (when  
290 compared to GF; Supplementary Figure 3).

291  
292 While our study has clear strengths and strong translational implications for pregnancy  
293 complication treatments, it also has certain limitations. Unsurprisingly, we did not see a full  
294 'rescue' of all placental and fetal responses in the monocolonised GF *B. breve* (BIF) group,  
295 compared to complex microbiota found in SPF dams. An array of gut-associated signaling and  
296 a diverse metabolite pool are expected to provide more complete fetal development and  
297 programming. Indeed, other or additional *Bifidobacterium* species and/or strains may be  
298 required for placental and fetal development, given strain-specific host physiology responses  
299 (10, 32). Further studies should allow the relative contributions of other microbial- and

300 *Bifidobacterium*-derived factors to be elucidated. Nonetheless, this study has revealed novel  
301 roles for *Bifidobacterium* and provides a safe therapeutic strategy for treating pregnancy  
302 complications, suggesting an opportunity for *in utero* programming through maternal  
303 *Bifidobacterium* and associated metabolites.

304

305 Overall, our study highlights the importance of the maternal gut microbiota during gestation  
306 and demonstrates that *B. breve* modulates maternal physiology, placental capillarization and  
307 nutrient transporter capacity with impact on fetal glycaemia and fetal growth. Our findings  
308 prompt an in-depth investigation into how additional members of the gut microbiota impact on  
309 pregnancy outcomes. These future studies are important for the design of novel therapies to  
310 combat fetal growth restriction and other pregnancy complications.

311

## 312 **Materials and Methods**

### 313 ***Bifidobacterium breve* UCC2003/pCheMC**

314 *B. breve* UCC2003/pCheMC was generated by introducing the plasmid pCheMC to  
315 electrocompetent *B. breve* UCC2003 as described previously (33). In brief, *B. breve* UCC2003  
316 was grown until mid-log phase, chilled on ice and washed twice with ice cold sucrose citrate  
317 buffer (1mM citrate, 0.5M sucrose, pH5.8) and then electroporation of cells was carried out  
318 under the following conditions; 25 MF, 200 Ohms, 2 KV. Transformed cells were incubated for  
319 2 hours in Reinforced Clostridial Medium (RCM) at 37°C in a controlled anaerobic chamber  
320 then plated (34) on RCM agar plates with selective antibiotics. Colonies were sub-cultured 3  
321 times on RCM agar plates with selective antibiotics. Antibiotics were used at the following final  
322 concentrations erythromycin 2µg/mL.

323

### 324 **Lyophilised *B breve***

325 *B. breve* was grown in De Man, Rogosa and Sharpe agar (MRS) under anaerobic conditions  
326 overnight. The bacterial cell pellet was resuspended in 10% milk powder and lyophilised in 200  
327 ml quantities. Lyophilised *B. breve* was reconstituted with 500µl PBS. Concentration of *B.*  
328 *breve* was 10<sup>10</sup>CFU/ml. All batches were tested for contamination upon reconstitution on Luria-

329 Bertani (LB) and Brain-Heart Infusion (BHI) plates under anaerobic and aerobic conditions at  
330 37°C. No contamination of *B. breve* was detected.

331

### 332 **Mice**

333 All mouse experiments were performed under the UK Regulation of Animals (Scientific  
334 Procedures) Act of 1986. The project license PDADA1B0C under which these studies were  
335 carried out was approved by the UK Home Office and the UEA Ethical Review Committee. All  
336 mice were housed in the Disease Modelling Unit at the University of East Anglia, UK. Animals  
337 were housed in a 12:12 hour light/dark, temperature-controlled room and allowed food and  
338 water ad libitum. Female Germ Free C57BL/6J (GF) and Specific Pathogen Free (SPF) mice  
339 aged 6-8 weeks were used for the study. GF mice were bred in germ free isolators (2 females  
340 to 1 male) and on gestational day (GD) GD9.5, pregnant mice (confirmed by weight) were  
341 removed from the GF isolator and transferred to individually ventilated cages. The sterility of  
342 these cages was previously tested and found to be suitable for housing GF mice for 1 week.  
343 Sterile water was changed every 2 days. At GD10, mice were dosed by oral gavage with  
344 100µL of *B. breve* UCC2003 at  $10^{10}$  CFU/mL or 100µL vehicle control (PBS, 4 % skimmed milk  
345 powder). At GD16.5 and GD18.5, mice were sacrificed by cervical dislocation and samples  
346 collected for molecular and histological analysis. The experimental design can be found in  
347 Supplementary Figure 1.

348

### 349 ***B. breve* colonisation levels**

350 Faecal samples were checked for contamination and *B. breve* colonisation. Briefly, faecal  
351 samples from GF and GF treated with *B. breve* were diluted in 500 µL of PBS and agitated for  
352 30 mins at 4°C on an Eppendorf MixMate 5353 Digital Mixer Plate Shaker. The faecal solution  
353 was passed through a 0.45µm syringe filter. Faecal solution was diluted 1 in 100 and 20 µL  
354 was added to a De Man, Rogosa and Sharpe agar plate with erythromycin and incubated for  
355 48 hours in an anaerobic chamber at 37°C. Colony forming units were counted using a click  
356 counter.

357

358

359 **Blood hormones and circulating metabolites**

360 Maternal blood was obtained by cardiac exsanguination immediately after cervical dislocation.  
361 Blood was centrifuged and serum collected and stored at -80°C until further analysis. Blood  
362 glucose and plasma concentrations of leptin, insulin, triglycerides, cholesterol, and free fatty  
363 acids were determined as previously reported (35). Fetal blood glucose levels were measured  
364 with a handheld glucometer (One Touch Ultra; LifeScan) immediately after decapitation of the  
365 fetus.

366

367 **Placental histology**

368 Placentas were cut in half and fixed in 4% paraformaldehyde overnight at 4°C. Samples were  
369 washed 3 times with PBS for 15 minutes each and storage in 70% ethanol until embedding in  
370 wax. Embedded placentas were cut at 5µm thickness and stained with haematoxylin and eosin  
371 for gross morphology. Placental layer volumes were calculated using the Computer Assisted  
372 Stereological Toolbox (CAST v2.0). For analysis of labyrinth components, sections were  
373 stained with lectin for identification of fetal endothelial vessels and with cytokeratin for  
374 trophoblasts. Further details of the double-labelling immunohistochemistry and the analysis  
375 performed can be found elsewhere (36). For the analysis of placental glycogen, sections were  
376 stained with Periodic acid–Schiff (Sigma-Aldrich) previous incubation with 0.5% periodic acid  
377 (Thermo Fisher Scientific). Sections were counterstained with Fast-green (Sigma-Aldrich) and  
378 digitalized with the nanozoomer scanner (Hamamatsu). Analysis of placental glycogen  
379 accumulation was performed with Image J and conducted blinded to experimental groups.  
380 TUNEL staining for placental cell death was performed using the TUNEL Assay Kit - HRP-DAB  
381 (Abcam, ab206386) following manufacturer instructions except for the counterstaining which  
382 was substituted for Nuclear Fast Red (Vector). Sections were digitalized using a nanozoomer  
383 scanner (Hamamatsu) and the amount of apoptosis in the labyrinth zone was calculated in 5  
384 random areas (x20 magnification) and analysed by Image J software.

385

386 **RNA extraction and qPCR**

387 Extraction of RNA from micro-dissected placental labyrinth zones was performed with RNeasy  
388 Plus Mini Kit (Qiagen) and reverse transcribed using the High Capacity cDNA RT Kit minus RT

389 inhibitor (Applied Biosystems) according to manufacturer's instructions. Samples were  
390 analysed using MESA Blue SYBR (Eurogentec) and primers (See Supplementary Table 3)  
391 were synthesized by Sigma-Aldrich. The expression of each gene was normalized to the  
392 geometric mean expression of two reference genes *Hprt* and *Ubc*, which remained stably  
393 expressed across the groups. Analysis was performed using the  $2^{-\Delta\Delta C_t}$  method (37).

394

### 395 **Sequence pre-processing, Differential Gene Expression (DGE) analysis and Functional** 396 **enrichment analysis**

397 Fetal liver RNA on GD18.5 was extracted using the RNeasy Plus Mini Kit (Qiagen). RNA  
398 sequence pre-processing and DGE analysis was performed as previously described with slight  
399 modifications (9). Briefly, FASTQ reads were initially quality-filtered using fastp v0.20.0 with  
400 options -q 10 (sequence reads with phred quality <10 were discarded). Subsequently,  
401 sequence reads for each sample were merged (merge-paired-reads.sh) and followed by rRNA  
402 sequence filtering via SortMeRNA v2.1 based on SILVA rRNA database optimised for  
403 SortMeRNA software (38, 39). Filtered reads were then unmerged (unmerge-paired-reads.sh)  
404 and ready for transcript quantification. Transcript mapping and quantification were then  
405 performed using Kallisto v0.44.0 (40). *Mus musculus* (C57BL/6 mouse) cDNA sequences  
406 (GRCm38.release-98\_k31) retrieved from Ensembl database were indexed with Kallisto utility  
407 *index* at default parameter and was used for following transcript mapping and abundance  
408 quantification via Kallisto utility *quant* at 100 bootstrap replicates (-b 100) (41).

409

410 RNA raw counts were subjected (Kallisto outputs) to DGE analysis, which was performed  
411 using R library *Sleuth* (v0.30.0) (42). Transcripts were then mapped to individual genes using  
412 Ensembl BioMart database (GRCm38.p6) with function *sleuth\_prep* and option *gene\_mode* =  
413 *TRUE*. Genes with an absolute  $\log_2$  (fold change) >1.0 and q value <0.05 (p-adjusted value;  
414 based on Wald test statistics) were considered to be differentially regulated (43). DGE  
415 statistics were plotted via functions within package *Sleuth*. Finally, functional enrichment  
416 analysis was performed using g:Profiler webtool g:GOst based on organism *Mus Musculus*  
417 species (44). Briefly, a list of DGEs (Ensembl IDs) was uploaded to g:GOst, then selected 'GO

418 molecular function', 'GO biological process' and 'Reactome' in the 'data sources'. Significance  
419 threshold was set at 0.001 (g:SCS threshold).

420

421 **Metabolite extraction, Nuclear Magnetic Resonance (NMR) spectroscopy and metabolite**  
422 **quantification**

423 Extraction of metabolite from liver, placenta, caecum contents and culture (spent) media  
424 samples were performed as previously described as a standard protocol (45). For caecal  
425 samples, frozen materials (stored at -80°C prior to analysis) were weighed ~50 mg before the  
426 addition of 600 µL of faecal water phosphate buffer solution. The faecal water phosphate buffer  
427 was prepared as follows: add 0.51g NaH<sub>2</sub>PO<sub>4</sub>.H<sub>2</sub>O and 2.82g K<sub>2</sub>HPO<sub>4</sub> to 200 mL D<sub>2</sub>O  
428 (Deuterium Oxide; Merck). To this, 34.5 mg TSP (Trimethylsilyl propanoic acid; used as NMR  
429 standard) and 100 mg NaN<sub>3</sub> (Merck) were added (46). Next, the mixture was centrifuged for 10  
430 min at 17,000 x g before transferring the mixture to an NMR tube (Merck) for subsequent NMR  
431 analysis.

432

433 For liver and placenta samples (stored at -80°C prior to analysis), frozen fresh tissue (~20-45  
434 mg) was placed into a 2 ml sterile microcentrifuge tube pre-loaded with ~15-20 glass beads  
435 (Merck) while 200 µL of ice-cold methanol (Fisher Scientific) and 42.5 µL of ultra-pure cold  
436 water were added to it and vortexed. Tissue was disrupted via a tissue lyser (Qiagen) for 2 x 2  
437 mins. 100 µL of ice-cold chloroform (Merck) was then added and vortexed. 100 µL of ice-cold  
438 chloroform and 100 µL of ultra-pure cold water were added to the mixture, and kept on ice for  
439 15 min. Liquid was then transferred into a new sterile microcentrifuge tube and centrifuged for  
440 3 min at 17,000 x g. The top aqueous phase was transferred into a new microcentrifuge tube  
441 and speed-vacuumed for 30 min at 50°C and 30 min without heating prior to reconstitution with  
442 faecal water phosphate buffer solution at 600 µL. The mixture was then moved to an NMR  
443 tube (Merck) for subsequent NMR analysis. Metabolites from culture media Brain Heart  
444 Infusion (BHI; Oxoid) and spent media (BHI cultured with *B. breve* UCC2003 for 48 h) were  
445 extracted as follows: 400 µL of medium was transferred into a sterile microcentrifuge tube with  
446 the addition of 200 µL faecal phosphate buffer and mixed well. The mixture was then moved to  
447 an NMR tube (Merck) for further NMR analysis.

448

449 Samples in NMR tubes were subsequently subjected to NMR spectroscopy. The  $^1\text{H}$  NMR  
450 spectra were recorded at 600 MHz on a Bruker AVANCE spectrometer (Bruker BioSpin  
451 GmbH, Germany) running Topspin 2.0 software. The metabolites were then quantified using  
452 the software Chenomx® NMR Suite 7.0™.

453

#### 454 **Statistical analysis**

455 All statistical analysis and sample size are shown in each figure/table and in the corresponding  
456 figure/table legends. No statistical analysis was used to pre-determine sample size and  
457 samples were assigned code numbers and analysis was performed in a blinded fashion.  
458 Statistical calculations were performed using the GraphPad Prism software (GraphPad, San  
459 Diego, CA), and RStudio Version 1.4.1106 (RStudio Boston, MA) with R Version 4.0.3 (Vienna,  
460 Austria). Morphometric parameters of mother, placenta and fetus were analysed by one-way  
461 ANOVA followed by Tukey post hoc test. Differences between individual metabolites between  
462 the three groups were tested with a Kruskal-Wallis test using the `kruskal.test` function with  
463 correction for multiple comparisons applied using the Benjamini & Hochberg false discovery  
464 rate method using the `p.adjust` function. Pairwise comparisons between the three groups were  
465 carried out with a Dunn's test on individual metabolites significantly different after correction for  
466 multiple comparisons using the `dunnTest` function in the FSA package. SGA rate was analysed  
467 by contingency retrospective analysis and Fisher's exact test. ROUT test was used for  
468 identification of outlier values. A probability value of  $<0.05$  was considered significantly  
469 different.

470

#### 471 **Acknowledgments**

472 JL-T currently holds a Sir Henry Wellcome Postdoctoral Fellowship (220456/Z/20/Z) and  
473 previously a Newton International Fellowship from the Royal Society (NF170988 / RG90199).  
474 LJH is supported by Wellcome Trust Investigator Awards (100974/C/13/Z and 220876/Z/20/Z);  
475 the Biotechnology and Biological Sciences Research Council (BBSRC), Institute Strategic  
476 Programme Gut Microbes and Health (BB/R012490/1), and its constituent projects



477 BBS/E/F/000PR10353 and BBS/E/F/000PR10356. ANS-P is supported by a Lister Institute of  
478 Preventative Medicine Research Prize (RG93692).

479

#### 480 **Data availability**

481 The fetal liver RNA-Seq raw sequencing data are deposited at the National Center for  
482 Biotechnology Information (NCBI) under BioProject PRJNA748000. Relevant data are within  
483 the manuscript and its Supporting Information files. Scripts for differential gene expression  
484 analysis can be accessed at GitHub, [https://github.com/raymondkiu/Maternal-foetal-](https://github.com/raymondkiu/Maternal-foetal-microbiota-paper/)  
485 [microbiota-paper/](https://github.com/raymondkiu/Maternal-foetal-microbiota-paper/)

486

#### 487 **Figure legends**

488

489 **Figure 1. Effects of maternal gut microbiome and *B. breve* supplementation during**  
490 **pregnancy on fetal viability, growth and hepatic transcriptome. (A)** Number of viable  
491 fetuses per litter, **(B)** Number of resorptions per litter (left) and number of dams with presence  
492 of resorptions within the litter (right), **(C)** Conceptus mass defined as the sum of the fetus and  
493 placenta, **(D)** Fetal weight, **(E)** Rate of small for gestational age (SGA) defined as fetuses  
494 below the 10<sup>th</sup> percentile ( $\leq 490\text{mg}$ ), **(F)** Fetal organ weights, and **(G)** Fetal blood glucose  
495 concentrations on GD16.5, **(H-K)** RNA-Seq analysis of fetal liver samples obtained at GD18.5  
496 ( $n=5/\text{group}$ ), **(H)** PCA plot and **(I)** volcano plots showing up and down-regulated DEGs in BIF  
497 group (compared to GF group), **(J)** Heat map of the 20 most up and down-regulated DEGs  
498 (BIF group), **(K)** Functional profiling (g:Profiler) on 602 DEGs. Key enriched GO terms and  
499 REACTOME pathways are shown in the figure (significant threshold:  $P_{\text{adj}} < 0.001$ ). Statistical  
500 analysis for data shown in **A-G** was performed with ROUT test for outlier identification followed  
501 by one-way ANOVA Tukey multiple comparisons test. Data in **E** was analysed using  
502 contingency retrospectively analysis (Fisher's exact test). RNA-Seq data analysis is described  
503 in the material and methods section. Different superscripts indicate significant differences  
504 between groups (a *versus* b and/or c:  $P < 0.05$ ;  $\text{mean} \pm \text{SEM}$ ). In figure **E**, \*denotes differences  
505 compared to the SPF group and <sup>y</sup>symbol denotes differences between GF and BIF.

506

507 **Figure 2. Effects of maternal gut microbiome and *B. breve* supplementation during**  
508 **pregnancy on placental structure and placental gene expression on GD16.5. (A)** Placenta  
509 weight, **(B)** Placental efficiency determined by dividing fetal by placental mass, **(C)** Placental  
510 regional analysis, **(D)** Representative staining of placental glycogen with PAS and glycogen  
511 abundance, **(E)** Representative image of lectin and cytokeratin staining for labyrinth zone  
512 structural quantification, **(F-I)** Stereological parameters determined in placental labyrinth zone,  
513 **(J)** Representative image of TUNEL staining for apoptosis quantification in labyrinth zone **(K-**  
514 **O)**, Gene expression levels in micro-dissected labyrinth zones (n=13/11/14 for SPF, GF and  
515 BIF respectively). ROUT test was used for identification of outlier values. Data were analyzed  
516 by one-way ANOVA followed by Tukey multiple comparisons test. Different superscripts  
517 indicate significant differences between groups (a *versus* b: P<0.05; mean±SEM).

518

519 **Figure 3. Metabolomic profiling of placental labyrinth zone and fetal liver on GD16.5.**  
520 Data were analysed by Kruskal-Wallis test followed by multiple comparisons using the  
521 Benjamini & Hochberg false discovery rate method and Dunn's test. ROUT test was used for  
522 identification of outlier values. Different superscripts indicate significant differences between  
523 groups (a *versus* b, P<0.05). Data presented as mean±SEM.

524

525 **Supplementary Figure 1. Schematic representation of the experimental design.**

526 *B. breve* was administrated by oral gavage on gestational day (GD) 10, 12 and 14 to germ-free  
527 mice. Abbreviations: LZ (placental labyrinth zone); SPF (Specific-Pathogen-Free mouse); GF  
528 (Germ-Free mouse); BIF (Germ-Free mouse treated with *B. breve* UCC2003).

529

530 **Supplementary Figure 2. Colonization levels of *B. breve* determined in maternal faecal**  
531 **samples.** Analysis performed by student-t test (\*\*\*\*P<0.0001). Data displayed as mean ±  
532 SEM. Number of dams for GF (white bar) and BIF (grey bar) are 5 and 6, respectively.

533

534 **Supplementary Figure 3. Summary illustration showing how the maternal gut bacteria**  
535 **and *B. breve* affects mother, placenta and fetus during gestation.** Abbreviations: LZ  
536 (placental labyrinth zone); SPF (Specific-Pathogen-Free mouse); GF (Germ-Free mouse); BIF

537 (Germ-Free mouse treated with *B. breve* UCC2003); MBS (Maternal Blood Spaces); FC (Fetal  
538 Capillaries); SA (Surface Area); SGA (Small Gestational Age)

539

540 **Table 1. Effects of maternal gut microbiome and *B. breve* administration during**  
541 **pregnancy on maternal body composition, circulating metabolites and hormones in**  
542 **maternal serum, and metabolites in caecum.** Body composition and metabolites/hormones  
543 in serum were analyzed by one-way ANOVA followed by Tukey multiple comparisons test.  
544 Metabolites in maternal caecum were analysed by Kruskal-Wallis test followed by multiple  
545 comparisons using the Benjamini & Hochberg false discovery rate method and Dunn's test.  
546 ROUT test was used for identification of outlier values. Different superscripts indicate  
547 significant differences between groups (a *versus* b,  $P < 0.05$ ) (\* $P < 0.05$ ; \*\* $P < 0.01$ ; \*\*\* $P < 0.001$ ;  
548 \*\*\*\* $P < 0.0001$ ; NS: not significant). Data presented as mean $\pm$ SEM.

549

550 **Supplementary Table 1. List of differentially expressed genes and pathways detected in**  
551 **the liver RNA-Seq**

552

553 **Supplementary Table 2. List of metabolites analysed in maternal caecum, placental**  
554 **labyrinth zone and fetal liver on day 16 of gestation.**

555

556 **Supplementary Table 3. List of primers used for placental labyrinth zone qPCR**

557

## 558 **References**

- 559 1. R. Krajmalnik-Brown, Z.-E. Ilhan, D.-W. Kang, J. K. DiBaise, Effects of Gut Microbes on  
560 Nutrient Absorption and Energy Regulation. *Nutr Clin Pract* **27**, 201–214 (2012).
- 561 2. B. McDonald, K. D. McCoy, Maternal microbiota in pregnancy and early life. *Science* **365**,  
562 984–985 (2019).
- 563 3. M. G. de Agüero, *et al.*, The maternal microbiota drives early postnatal innate immune  
564 development. *Science* **351**, 1296–1302 (2016).
- 565 4. O. Koren, *et al.*, Host remodeling of the gut microbiome and metabolic changes during  
566 pregnancy. *Cell* **150**, 470–480 (2012).
- 567 5. M. Nuriel-Ohayon, *et al.*, Progesterone Increases Bifidobacterium Relative Abundance  
568 during Late Pregnancy. *Cell Rep* **27**, 730-736.e3 (2019).

- 569 6. T. Napso, H. Yong, J. Lopez-Tello, A. N. Sferruzzi-Perri, The role of placental hormones  
570 in mediating maternal adaptations to support pregnancy and lactation. *Front. Physiol.* **9**  
571 (2018).
- 572 7. K. Pokusaeva, G. F. Fitzgerald, D. van Sinderen, Carbohydrate metabolism in  
573 Bifidobacteria. *Genes Nutr* **6**, 285–306 (2011).
- 574 8. M. J. Dalby, L. J. Hall, Recent advances in understanding the neonatal microbiome.  
575 *F1000Res* **9**, F1000 Faculty Rev-422 (2020).
- 576 9. R. Kiu, *et al.*, Bifidobacterium breve UCC2003 Induces a Distinct Global Transcriptomic  
577 Program in Neonatal Murine Intestinal Epithelial Cells. *iScience* **23**, 101336 (2020).
- 578 10. K. R. Hughes, *et al.*, Bifidobacterium breve reduces apoptotic epithelial cell shedding in an  
579 exopolysaccharide and MyD88-dependent manner. *Open Biol* **7**, 160155 (2017).
- 580 11. T. Miao, *et al.*, Decrease in abundance of bacteria of the genus Bifidobacterium in gut  
581 microbiota may be related to pre-eclampsia progression in women from East China. *Food*  
582 *& Nutrition Research* (2021) <https://doi.org/10.29219/fnr.v65.5781> (July 5, 2021).
- 583 12. S. Fukuda, *et al.*, Bifidobacteria can protect from enteropathogenic infection through  
584 production of acetate. *Nature* **469**, 543–547 (2011).
- 585 13. M. A. González Hernández, E. E. Canfora, J. W. E. Jocken, E. E. Blaak, The Short-Chain  
586 Fatty Acid Acetate in Body Weight Control and Insulin Sensitivity. *Nutrients* **11**, 1943  
587 (2019).
- 588 14. M. Priyadarshini, *et al.*, Maternal short-chain fatty acids are associated with metabolic  
589 parameters in mothers and newborns. *Transl Res* **164**, 153–157 (2014).
- 590 15. A. N. Thorburn, *et al.*, Evidence that asthma is a developmental origin disease influenced  
591 by maternal diet and bacterial metabolites. *Nat Commun* **6**, 7320 (2015).
- 592 16. C. H. Kim, Control of lymphocyte functions by gut microbiota-derived short-chain fatty  
593 acids. *Cell Mol Immunol* **18**, 1161–1171 (2021).
- 594 17. R. Aoki, *et al.*, A proliferative probiotic Bifidobacterium strain in the gut ameliorates  
595 progression of metabolic disorders via microbiota modulation and acetate elevation. *Sci*  
596 *Rep* **7**, 43522 (2017).
- 597 18. K. Kikuchi, M. Ben Othman, K. Sakamoto, Sterilized bifidobacteria suppressed fat  
598 accumulation and blood glucose level. *Biochem Biophys Res Commun* **501**, 1041–1047  
599 (2018).
- 600 19. H. Wu, *et al.*, Metformin alters the gut microbiome of individuals with treatment-naive type  
601 2 diabetes, contributing to the therapeutic effects of the drug. *Nat Med* **23**, 850–858  
602 (2017).
- 603 20. A. Solito, *et al.*, Supplementation with Bifidobacterium breve BR03 and B632 strains  
604 improved insulin sensitivity in children and adolescents with obesity in a cross-over,  
605 randomized double-blind placebo-controlled trial. *Clinical Nutrition* **40**, 4585–4594 (2021).
- 606 21. J. López-Tello, *et al.*, Fetal and trophoblast PI3K p110 $\alpha$  have distinct roles in regulating  
607 resource supply to the growing fetus in mice. *Elife* **8** (2019).
- 608 22. J. M. Frost, G. E. Moore, The Importance of Imprinting in the Human Placenta. *PLOS*  
609 *Genetics* **6**, e1001015 (2010).
- 610 23. A. N. Sferruzzi-Perri, I. Sandovici, M. Constancia, A. L. Fowden, Placental phenotype and  
611 the insulin-like growth factors: resource allocation to fetal growth. *J Physiol* **595**, 5057–  
612 5093 (2017).

- 613 24. A. N. Sferruzzi-Perri, *et al.*, Placental-specific Igf2 deficiency alters developmental  
614 adaptations to undernutrition in mice. *Endocrinology* **152**, 3202–3212 (2011).
- 615 25. A. Yevtodiyyenko, J. V. Schmidt, Dlk1 expression marks developing endothelium and sites  
616 of branching morphogenesis in the mouse embryo and placenta. *Developmental*  
617 *Dynamics* **235**, 1115–1123 (2006).
- 618 26. C.-C. Huang, *et al.*, Soluble delta-like 1 homolog (DLK1) stimulates angiogenesis through  
619 Notch1/Akt/eNOS signaling in endothelial cells. *Angiogenesis* **21**, 299–312 (2018).
- 620 27. K. Forbes, M. Westwood, P. N. Baker, J. D. Aplin, Insulin-like growth factor I and II  
621 regulate the life cycle of trophoblast in the developing human placenta. *American Journal*  
622 *of Physiology-Cell Physiology* **294**, C1313–C1322 (2008).
- 623 28. A. Cuenda, S. Rousseau, p38 MAP-Kinases pathway regulation, function and role in  
624 human diseases. *Biochimica et Biophysica Acta (BBA) - Molecular Cell Research* **1773**,  
625 1358–1375 (2007).
- 626 29. J. S. Mudgett, *et al.*, Essential role for p38 $\alpha$  mitogen-activated protein kinase in placental  
627 angiogenesis. *PNAS* **97**, 10454–10459 (2000).
- 628 30. A. N. Sferruzzi-Perri, J. S. Higgins, O. R. Vaughan, A. J. Murray, A. L. Fowden, Placental  
629 mitochondria adapt developmentally and in response to hypoxia to support fetal growth.  
630 *Proc. Natl. Acad. Sci. U.S.A.* **116**, 1621–1626 (2019).
- 631 31. Z. Fan, Y. Han, Y. Ye, C. Liu, H. Cai, L-carnitine preserves cardiac function by activating  
632 p38 MAPK/Nrf2 signalling in hearts exposed to irradiation. *European Journal of*  
633 *Pharmacology* **804**, 7–12 (2017).
- 634 32. L. Ruiz, S. Delgado, P. Ruas-Madiedo, B. Sánchez, A. Margolles, Bifidobacteria and Their  
635 Molecular Communication with the Immune System. *Front Microbiol* **8**, 2345 (2017).
- 636 33. A. Mazé, M. O’Connell-Motherway, G. F. Fitzgerald, J. Deutscher, D. van Sinderen,  
637 Identification and Characterization of a Fructose Phosphotransferase System in  
638 *Bifidobacterium breve* UCC2003. *Applied and Environmental Microbiology* **73**, 545 (2007).
- 639 34. M. Cronin, *et al.*, High Resolution In Vivo Bioluminescent Imaging for the Study of  
640 Bacterial Tumour Targeting. *PLOS ONE* **7**, e30940 (2012).
- 641 35. B. Musial, *et al.*, Proximity to Delivery Alters Insulin Sensitivity and Glucose Metabolism in  
642 Pregnant Mice. *Diabetes* **65**, 851–860 (2016).
- 643 36. K. De Clercq, J. Lopez-Tello, J. Vriens, A. N. Sferruzzi-Perri, Double-label  
644 immunohistochemistry to assess labyrinth structure of the mouse placenta with  
645 stereology. *Placenta* **94**, 44–47 (2020).
- 646 37. K. J. Livak, T. D. Schmittgen, Analysis of relative gene expression data using real-time  
647 quantitative PCR and the 2(-Delta Delta C(T)) Method. *Methods* **25**, 402–408 (2001).
- 648 38. S. Chen, Y. Zhou, Y. Chen, J. Gu, fastp: an ultra-fast all-in-one FASTQ preprocessor.  
649 *Bioinformatics* **34**, i884–i890 (2018).
- 650 39. E. Kopylova, L. Noé, H. Touzet, SortMeRNA: fast and accurate filtering of ribosomal  
651 RNAs in metatranscriptomic data. *Bioinformatics* **28**, 3211–3217 (2012).
- 652 40. N. L. Bray, H. Pimentel, P. Melsted, L. Pachter, Near-optimal probabilistic RNA-seq  
653 quantification. *Nat Biotechnol* **34**, 525–527 (2016).
- 654 41. D. R. Zerbino, *et al.*, Ensembl 2018. *Nucleic Acids Res* **46**, D754–D761 (2018).
- 655 42. H. Pimentel, N. L. Bray, S. Puente, P. Melsted, L. Pachter, Differential analysis of RNA-  
656 seq incorporating quantification uncertainty. *Nat Methods* **14**, 687–690 (2017).

- 657 43. R. J. Kinsella, *et al.*, Ensembl BioMarts: a hub for data retrieval across taxonomic space.  
658 *Database (Oxford)* **2011**, bar030 (2011).
- 659 44. U. Raudvere, *et al.*, g:Profiler: a web server for functional enrichment analysis and  
660 conversions of gene lists (2019 update). *Nucleic Acids Res* **47**, W191–W198 (2019).
- 661 45. G. Le Gall, Sample collection and preparation of biofluids and extracts for NMR  
662 spectroscopy. *Methods Mol Biol* **1277**, 15–28 (2015).
- 663 46. J. Wu, Y. An, J. Yao, Y. Wang, H. Tang, An optimised sample preparation method for  
664 NMR-based faecal metabonomic analysis. *Analyst* **135**, 1023–1030 (2010).

665  
666

667

668

669

670

671

672

673

674

675

676

677

678

679

680

681

682

683

684

685

686

687 Table 1

688

689

690

691

| <b>Body composition</b>                               |                           |                           |                           |      |
|-------------------------------------------------------|---------------------------|---------------------------|---------------------------|------|
|                                                       | SPF (n=6)                 | GF (n=5)                  | BIF (n=6)                 |      |
| Hysterectomy weight (g)                               | 26.01±0.91                | 27.87±0.78                | 27.17±0.80                | NS   |
| Digestive Tract (g)                                   | 2.76±0.03 <sup>a</sup>    | 6.83±0.32 <sup>b</sup>    | 7.25±0.63 <sup>b</sup>    | **** |
| Caecum (g)                                            | 0.66±0.03 <sup>a</sup>    | 3.47±0.25 <sup>b</sup>    | 3.96±0.41 <sup>b</sup>    | **** |
| Small intestine (g)                                   | 1.66±0.03 <sup>a</sup>    | 2.65±0.11 <sup>b</sup>    | 2.59±0.14 <sup>b</sup>    | **** |
| Pancreas (mg)                                         | 315.40±30.12 <sup>a</sup> | 183.40±24.74 <sup>b</sup> | 190.60±38.71 <sup>b</sup> | *    |
| Gonadal fat (mg)                                      | 433.10±43.20 <sup>a</sup> | 297.0±37.02 <sup>ab</sup> | 272.0±27.35 <sup>b</sup>  | *    |
| Liver (g)                                             | 2.09±0.10 <sup>a</sup>    | 1.79±0.05 <sup>ab</sup>   | 1.55±0.08 <sup>b</sup>    | **   |
| Spleen (mg)                                           | 117.90±2.80 <sup>a</sup>  | 91.76±10.60 <sup>ab</sup> | 83.03±6.72 <sup>b</sup>   | *    |
| <b>Circulating metabolites and metabolic hormones</b> |                           |                           |                           |      |
|                                                       | SPF (n=6)                 | GF (n=5)                  | BIF (n=6)                 |      |
| Glucose (mmol/L)                                      | 8.08±0.78                 | 8.38±1.18                 | 8.88±0.74                 | NS   |
| Insulin (µg/L)                                        | 0.12±0.004                | 0.19±0.05                 | 0.20±0.06                 | NS   |
| Leptin (pg/mL)                                        | 2465±177.1                | 2739±486                  | 2425±303                  | NS   |
| Cholesterol (mmol/L)                                  | 1.33±0.03                 | 1.56±0.08                 | 1.41±0.09                 | NS   |
| Triglycerides (mmol/L)                                | 1.54±0.08                 | 1.79±0.14                 | 1.50±0.11                 | NS   |
| Free Fatty Acids (µmol/L)                             | 890.6±101.3               | 1440±362                  | 1092±114.5                | NS   |
| <b>Caecum Metabolites</b>                             |                           |                           |                           |      |
|                                                       | SPF (n=3)                 | GF (n=4)                  | BIF (n=4)                 |      |
| 2.Methylbutyrate (mmol/Kg)                            | 0.05±0.01 <sup>a</sup>    | 0±0.0 <sup>b</sup>        | 0±0.0 <sup>b</sup>        | *    |
| Isobutyrate (mmol/Kg)                                 | 0.41±0.24 <sup>a</sup>    | 0±0.0 <sup>b</sup>        | 0±0.0 <sup>b</sup>        | *    |
| Butyrate (mmol/Kg)                                    | 12.48±7.97 <sup>a</sup>   | 0±0.0 <sup>b</sup>        | 0±0.0 <sup>b</sup>        | *    |
| 5.Aminopentanoate (mmol/Kg)                           | 0.33±0.14 <sup>a</sup>    | 0±0.0 <sup>b</sup>        | 0±0.0 <sup>b</sup>        | *    |
| Propionate (mmol/Kg)                                  | 4.48±1.99 <sup>a</sup>    | 0±0.0 <sup>b</sup>        | 0±0.0 <sup>b</sup>        | *    |
| Citrulline (mmol/Kg)                                  | 0.30±0.07 <sup>a</sup>    | 0±0.0 <sup>b</sup>        | 0±0.0 <sup>b</sup>        | *    |
| Fucose (mmol/Kg)                                      | 0.08±0.02 <sup>a</sup>    | 0±0.0 <sup>b</sup>        | 0±0.0 <sup>b</sup>        | *    |
| Trimethylamine (mmol/Kg)                              | 0.06±0.006 <sup>a</sup>   | 0±0.0 <sup>b</sup>        | 0±0.0 <sup>b</sup>        | *    |
| Isovalerate (mmol/Kg)                                 | 0.09±0.01 <sup>a</sup>    | 0±0.0 <sup>b</sup>        | 0±0.0 <sup>b</sup>        | *    |
| Methylamine (mmol/Kg)                                 | 0.05±0.02 <sup>a</sup>    | 0±0.0 <sup>b</sup>        | 0±0.0 <sup>b</sup>        | *    |
| Malonate (mmol/Kg)                                    | 0.09±0.02 <sup>a</sup>    | 0±0.0 <sup>b</sup>        | 0±0.0 <sup>b</sup>        | *    |
| Valerate (mmol/Kg)                                    | 0.57±0.27 <sup>a</sup>    | 0±0.0 <sup>b</sup>        | 0±0.0 <sup>b</sup>        | *    |
| Acetate (mmol/Kg)                                     | 35.49±20.66 <sup>a</sup>  | 0.55±0.06 <sup>b</sup>    | 3.79±1.64 <sup>ab</sup>   | *    |

692 Supplementary Table 1 (Excel)

693 Supplementary Table 2 (Excel)

694 Supplementary Table 3

|                | <i>Forward</i>            | <i>Reverse</i>           |
|----------------|---------------------------|--------------------------|
| <i>Hprt</i>    | CAGGCCAGACTTTGTTGGAT      | TTGCGCTCATCTTAGGCTTT     |
| <i>Ubc</i>     | GGAGTCGCCCGAGGTCA         | AAAGATCTGCATCGTCTCTCTCAC |
| <i>Vegf</i>    | GAAGCTACTGCCGTCCGATT      | CTTCATCGTTACAGCAGCC      |
| <i>Ang1</i>    | GAAGCAACTTCTCAACAGACA     | TTCTTTGTGTTTTCCCTCCATT   |
| <i>Ang2</i>    | CTTCTACCTCGCTGGTGAAGAG    | GCTAAAATCACTTCCCTGGTTGG  |
| <i>Akt</i>     | GCCGCCTGATCAAGTTCTCC      | TTCAGATGATCCATGCGGGG     |
| <i>Mapk1</i>   | TGCTTTCTCTCCCGCACAAA      | GGCCAGAGCCTGTTCAACTT     |
| <i>Mapk14</i>  | AGCTGTGCGAGACCGTTTCAG     | GATGGGTCACCAGGTACACG     |
| <i>Dlk1</i>    | GAAAGGACTGCCAGCACAAAG     | CACAGAAGTTGCCTGAGAAGC    |
| <i>Igf2P0</i>  | GAGGAAGCTCTGCTGTTTGG      | CAAAGAGATGAGAAGCACCAAC   |
| <i>Hsd11b1</i> | GAGGAAGGTCTCCAGAAGGTA     | ATGTCCAGTCCGCCCAT        |
| <i>Hsd11b2</i> | GGCTGGATCGCGTTGTC         | CGTGAAGCCCATGGCAT        |
| <i>Slc38a1</i> | CGGCGCCTTTCCCTTTATTTT     | CCGTTAACTCGAGGCCACTT     |
| <i>Slc38a2</i> | TTCTGATTGTGGTGATTTGCAAGAA | CAGGATGGGCACAGCATACA     |
| <i>Slc38a4</i> | AAGGTAGAGGCGGAAAGGG       | AGGAACTTCTGACTTTCCGCA    |
| <i>Slc2a1</i>  | GCTTATGGGCTTCTCCAAACT     | GGTGACACCTCTCCACATAC     |
| <i>Slc2a3</i>  | GA TCGGCTCTTTCCAGTTTG     | CAA TCA TGCCACCAACAGAG   |
| <i>Cd36</i>    | ATGGGCTGTGATCGGAACTG      | GTCTTCCCAATAAGCATGTCTCC  |
| <i>Fatp1</i>   | GGCTCCTGGAGCAGGAACA       | ACGGAAGTCCCAGAAACCAA     |
| <i>Fatp3</i>   | GAGAACTTGCCACCGTATGC      | GGCCCCTATATCTTGGTCCA     |
| <i>Fatp4</i>   | GATTCTCCCTGTTGCTCCTGT     | CCATTGAAGCAAACAGCAGG     |
| <i>Fatp6</i>   | AACCAAGTGGTGACATCTCTGC    | TCCATAAAGTAAAGCGGGTCAG   |

695



SPF GF BIF

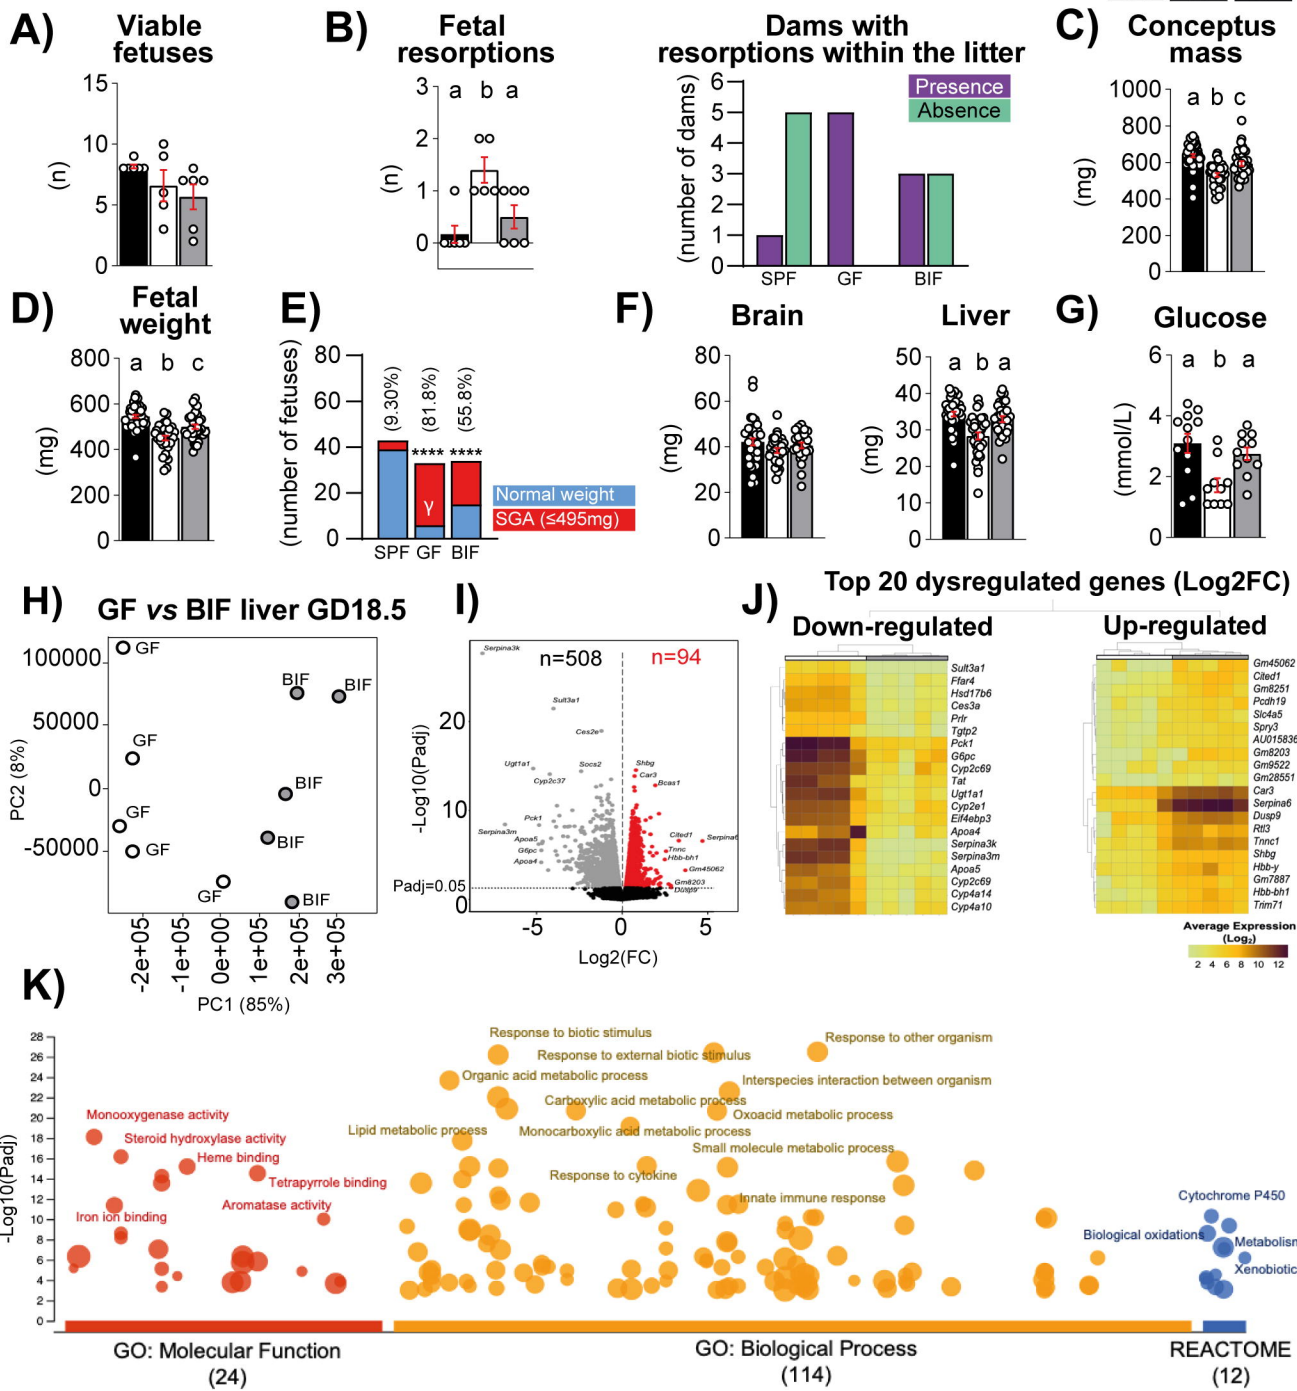

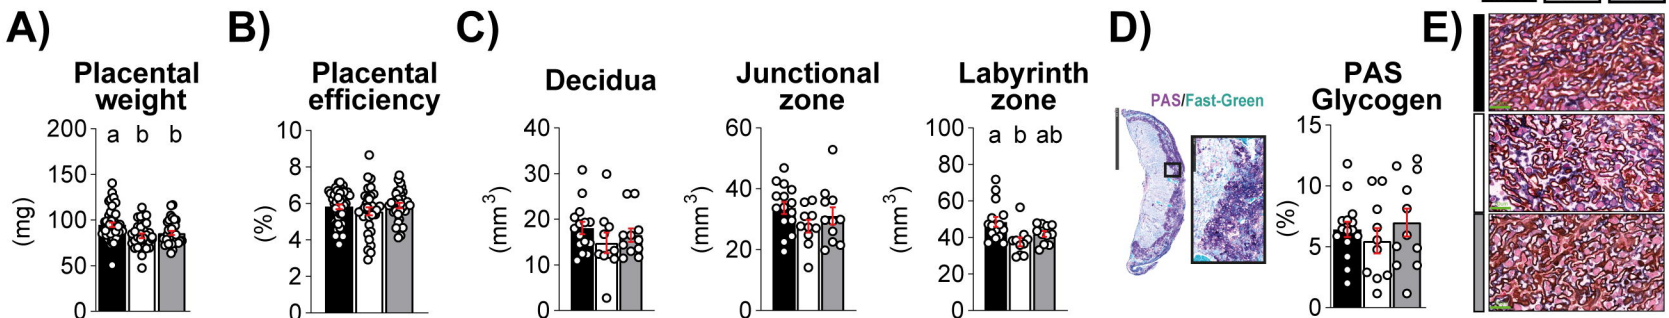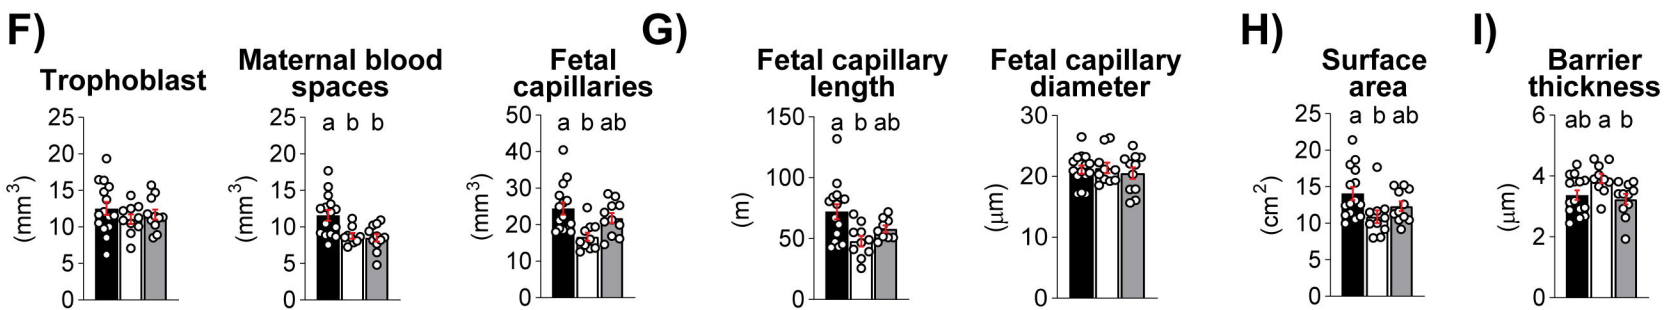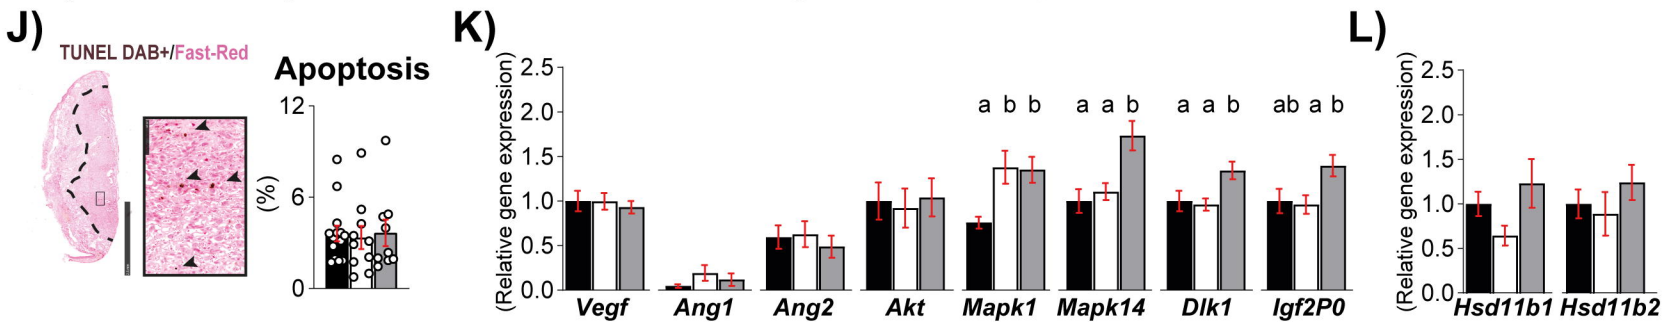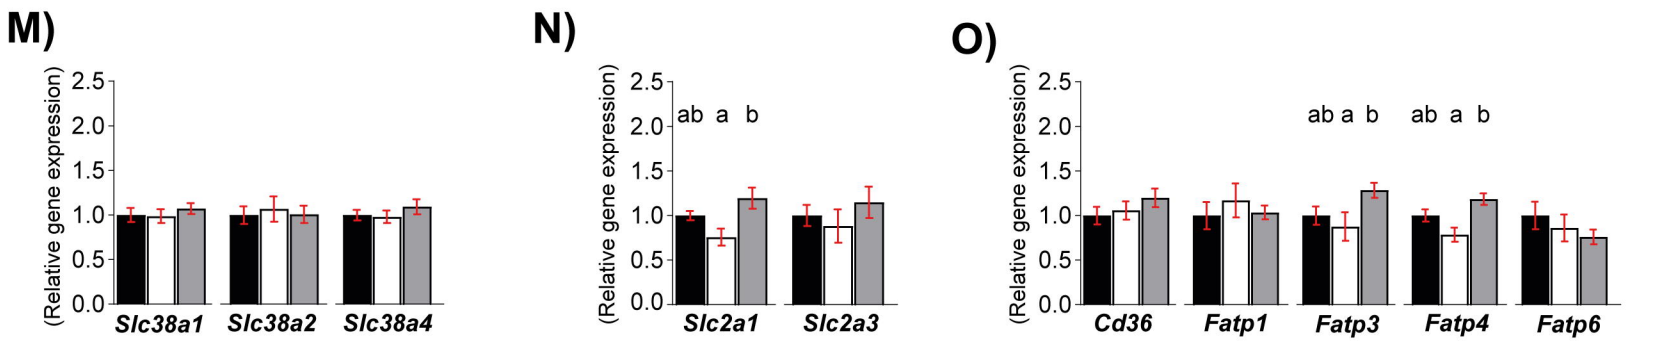

### A) Amino adipic acid

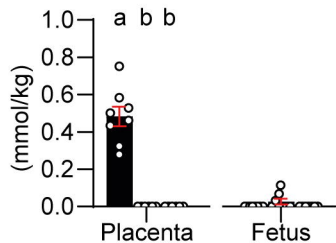

### B) Acetylcarnitine

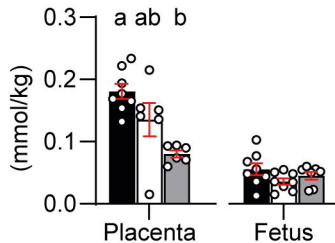

### C) Carnitine

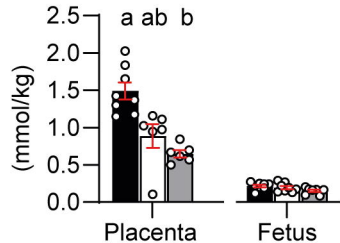

### D) Formate

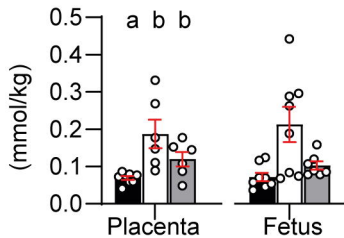

### E) Acetate

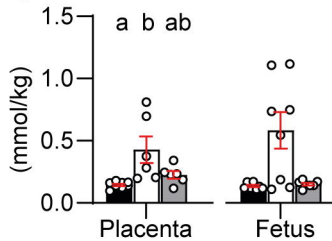

# Experimental groups

**SPF**

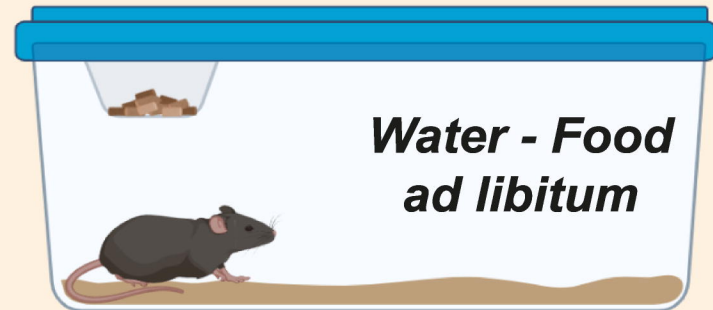

Water - Food  
ad libitum

Individually Ventilated Cages

+

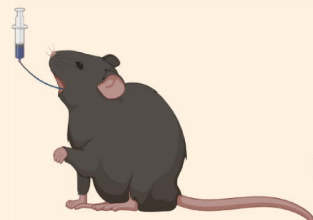

100  $\mu$ L vehicle  
control solution

Vehicle control solution administrated on:  
GD10 + GD12 + GD14

**GF**

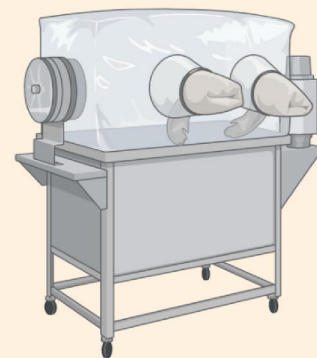

1) Germ free colony  
in flexible film isolator

Matings: Day of plug (GD0.5)  
Housed in isolator: GD0 to GD9

Transfer  
to

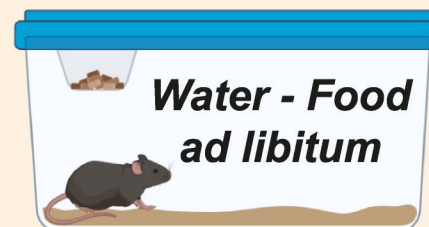

Water - Food  
ad libitum

2) Individually  
Ventilated Cages

+

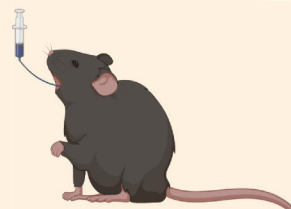

100  $\mu$ L vehicle  
control solution

Vehicle control solution administrated on:  
GD10 + GD12 + GD14

**BIF**

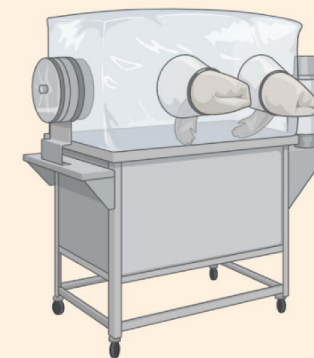

1) Germ free colony  
in flexible film isolator

Matings: Day of plug (GD0.5)  
Housed in isolator: GD0 to GD9

Transfer  
to

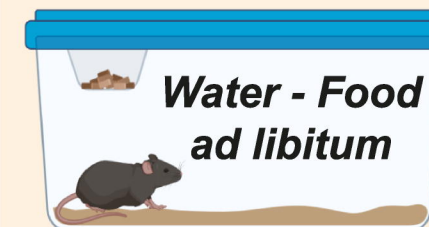

Water - Food  
ad libitum

2) Individually  
Ventilated Cages

+

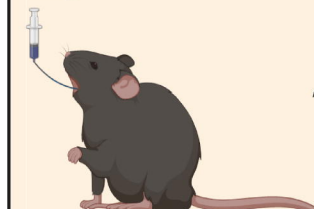

100  $\mu$ L of *B. breve* UCC2003 at  
 $10^{10}$  CFU/mL

*B. breve* UCC2003 administrated on:  
GD10 + GD12 + GD14

## Sampling

Maternal body  
composition  
and metabolism

(GD16.5)

Fetal Biometry  
Placental structural/functional  
analysis

(GD16.5)

Metabolomics:  
-Maternal caecum  
-Placental Lz  
-Fetal liver  
(GD16.5)

RNAseq  
of fetal liver

(GD18.5)

*B. Breve* UCC2003/g of faeces

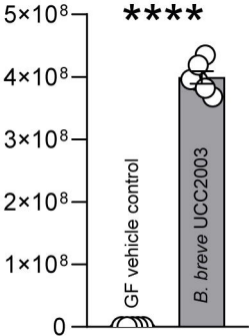

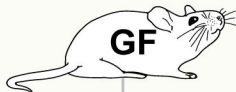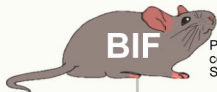

Parameters compared to SPF and/or GF

Treatment with *B. breve*

Maternal body composition

Liver  
Adipose  
Spleen

$\Delta$ Caecum metabolites  
methylbutyrate, butyrate,  
isobutyrate, propionate,  
aminopentanoate,  
citrulline, fucose,  
trimethylamine, malonate,  
methylamine, isovalerate,  
valerate, acetate

Acetate

↓ weight & Lz volume  
↓ MBS & FC  
↓ SA  
↑ barrier thickness

↑ Lz volume  
↓ FC  
↑ SA  
↓ barrier thickness

Acetate  
Acetylcarnitine  
Carnitine

$\Delta$ Placental metabolites  
amino adipic acid  
formate  
acetate

*Igf2p0* *Dlk1* *Mapk14*  
↑ nutrient transporters  
*Slc2a1* *Fatp3-4*

↑ fetal loss  
↓ weight  
↑ SGA rate  
↓ liver size  
↓ glucose levels

↓ fetal loss  
↑ weight  
↓ SGA rate  
↑ liver size  
↑ glucose levels

602  
hepatic  
genes

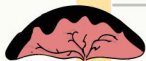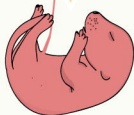

Source: http://biorxiv.org/content/10.1101/2021.07.23.453407v1.full.pdf
